# Supplementary material for: An Update on the Surveillance of Livestock Diseases and Antimicrobial Use in Sierra Leone in 2021—An Operational Research Study
Source: MDPI journal article supplement (doi:10.3390/ijerph19095294), 2022-04-27
Supplement: s1 [file s1]

**Table S1.** Number of livestock treated with antimicrobials or anthelmintic drugs use by region and livestock species in Sierra Leone, March- October 2021<sup>1</sup>

| Region     | Livestock species            | Susceptible livestock | Sick animals |                  | Livestock treated with antimicrobials |                  | Livestock treated with anthelmintics |                  |
|------------|------------------------------|-----------------------|--------------|------------------|---------------------------------------|------------------|--------------------------------------|------------------|
|            |                              | n                     | n            | (%) <sup>2</sup> | n                                     | (%) <sup>3</sup> | n                                    | (%) <sup>3</sup> |
| Northern   | Cattle                       | 888                   | 294          | (33.1)           | 153                                   | (52.0)           | 135                                  | (45.9)           |
|            | Dogs                         | 63                    | 6            | (9.5)            | 0                                     | (0.0)            | 4                                    | (66.7)           |
|            | Donkeys                      | 3                     | 1            | (33.3)           | 1                                     | (100.0)          | 0                                    | (0.0)            |
|            | Fowl                         | 594                   | 150          | (25.3)           | 0                                     | (0.0)            | 3                                    | (2.0)            |
|            | Goat                         | 4483                  | 2052         | (45.8)           | 608                                   | (29.6)           | 561                                  | (27.3)           |
|            | Goats and Sheep <sup>4</sup> | 1293                  | 804          | (62.2)           | 382                                   | (47.5)           | 378                                  | (47.0)           |
|            | Horse                        | 37                    | 15           | (40.5)           | 15                                    | (100.0)          | 15                                   | (100.0)          |
|            | Pig                          | 1472                  | 345          | (23.4)           | 19                                    | (5.5)            | 60                                   | (17.4)           |
|            | Rabbit                       | 0                     | 0            | (0)              | 0                                     | (0.0)            | 0                                    | (0.0)            |
|            | Sheep                        | 1135                  | 416          | (36.7)           | 131                                   | (31.5)           | 291                                  | (70.0)           |
| North West | Cattle                       | 260                   | 62           | (23.8)           | 9                                     | (14.5)           | 49                                   | (79.0)           |
|            | Dogs                         | 8                     | 2            | (25.0)           | 1                                     | (50.0)           | 1                                    | (50.0)           |
|            | Donkeys                      | 0                     | 0            | (0)              |                                       | (0.0)            | 0                                    | (0.0)            |
|            | Fowl                         | 1334                  | 212          | (15.9)           | 3                                     | (1.4)            | 40                                   | (18.9)           |
|            | Goat                         | 2322                  | 696          | (30.0)           | 377                                   | (54.2)           | 354                                  | (50.9)           |
|            | Goats and Sheep <sup>4</sup> | 0                     | 0            | (0)              | 0                                     | (0.0)            | 0                                    | (0.0)            |
|            | Horse                        | 0                     | 0            | (0)              | 0                                     | (0.0)            | 0                                    | (0.0)            |
|            | Pig                          | 40                    | 15           | (37.5)           | 0                                     | (0.0)            | 0                                    | (0.0)            |
|            | Rabbit                       | 40                    | 18           | (45.0)           | 0                                     | (0.0)            | 11                                   | (61.1)           |
|            | Sheep                        | 1408                  | 320          | (22.7)           | 164                                   | (51.3)           | 183                                  | (57.2)           |
| Western    | Cattle                       | 0                     | 0            | (0)              | 0                                     | (0.0)            | 0                                    | (0.0)            |
|            | Dogs                         | 86                    | 70           | (81.4)           | 37                                    | (52.9)           | 21                                   | (30.0)           |
|            | Donkeys                      | 4                     | 3            | (75.0)           | 0                                     | (0.0)            | 0                                    | (0.0)            |
|            | Fowl                         | 0                     | 0            | (0)              | 0                                     | (0.0)            | 0                                    | (0.0)            |
|            | Goat                         | 374                   | 220          | (58.8)           | 95                                    | (43.2)           | 119                                  | (54.1)           |
|            | Goats and Sheep <sup>4</sup> | 0                     | 0            | (0)              | 0                                     | (0.0)            | 0                                    | (0.0)            |
|            | Horse                        | 3                     | 1            | (33.3)           | 0                                     | (0.0)            | 1                                    | (100.0)          |
|            | Pig                          | 51                    | 31           | (60.8)           | 5                                     | (16.1)           | 0                                    | (0.0)            |
|            | Rabbit                       | 12                    | 12           | (100.0)          | 4                                     | (33.3)           | 12                                   | (100.0)          |
|            | Sheep                        | 228                   | 115          | (50.4)           | 63                                    | (54.8)           | 56                                   | (48.7)           |
| Eastern    | Cattle                       | 17                    | 5            | (29.4)           | 5                                     | (100.0)          | 5                                    | (100.0)          |
|            | Dogs                         | 533                   | 27           | (5.1)            | 5                                     | (18.5)           | 10                                   | (37.0)           |
|            | Donkeys                      | 0                     | 0            | (0)              | 0                                     | (0.0)            | 0                                    | (0.0)            |
|            | Fowl                         | 673                   | 146          | (21.7)           | 0                                     | (0.0)            | 0                                    | (0.0)            |
|            | Goat                         | 3486                  | 988          | (28.3)           | 352                                   | (35.6)           | 506                                  | (51.2)           |
|            | Goats and Sheep <sup>4</sup> | 36                    | 8            | (22.2)           | 0                                     | (0.0)            | 8                                    | (100.0)          |
|            | Horse                        | 0                     | 0            | (0)              | 0                                     | (0.0)            | 0                                    | (0.0)            |
|            | Pig                          | 152                   | 107          | (70.4)           | 76                                    | (71.0)           | 90                                   | (84.1)           |
|            | Rabbit                       | 0                     | 0            | (0)              | 0                                     | (0.0)            | 0                                    | (0.0)            |
|            | Sheep                        | 1540                  | 487          | (31.6)           | 225                                   | (46.2)           | 258                                  | (53.0)           |

|          |                              |       |             |           |            |
|----------|------------------------------|-------|-------------|-----------|------------|
| Southern | Cattle                       | 10    | 1 (10.0)    | 1 (100.0) | 0 (0.0)    |
|          | Dogs                         | 21    | 12 (57.1)   | 0 (0.0)   | 2 (16.7)   |
|          | Donkeys                      | 0     | 0 (0)       | 0 (0.0)   | 0 (0.0)    |
|          | Fowl                         | 3968  | 406 (10.2)  | 0 (0.0)   | 17 (4.2)   |
|          | Goat                         | 11533 | 2273 (19.7) | 144 (6.3) | 496 (21.8) |
|          | Goats and Sheep <sup>4</sup> | 80    | 23 (28.8)   | 20 (87.0) | 13 (56.5)  |
|          | Horse                        | 0     | 0 (0)       | 0 (0.0)   | 0 (0.0)    |
|          | Pig                          | 215   | 76 (35.3)   | 5 (6.6)   | 50 (65.8)  |
|          | Rabbit                       | 0     | 0 (0)       | 0 (0.0)   | 0 (0.0)    |
|          | Sheep                        | 6464  | 1353 (20.9) | 109 (8.0) | 203 (14.8) |

<sup>1</sup> Reports with discrepancies between numbers of susceptible vs sick vs treated were excluded from analysis

<sup>2</sup> Percentage of sick out of susceptible animals

<sup>3</sup> Percentage of animals initiated on antimicrobial or anthelmintic treatment out of sick animals

<sup>4</sup> Some reports mentioned species as "Goats and sheep", and disaggregated species wise information was not available, hence retained as a separate category

**Table S2.** Antimicrobials commonly used in animal species and their classification as per standard classification systems

| <b>Name of antimicrobial</b>   | <b>OIE<br/>classification<br/>of<br/>antimicrobials<br/>for veterinary<br/>use</b> | <b>WHO<br/>critically<br/>important<br/>antimicrobials<br/>for human<br/>medicine<br/>categories</b> | <b>European<br/>Medicines<br/>Agency<br/>classification</b> | <b>AwaRe<br/>classification</b> |
|--------------------------------|------------------------------------------------------------------------------------|------------------------------------------------------------------------------------------------------|-------------------------------------------------------------|---------------------------------|
| Tylosin                        | VCI                                                                                | CI (Highest priority)                                                                                | C                                                           | Not listed                      |
| Oxytetracycline                | VCI                                                                                | HI                                                                                                   | D                                                           | W                               |
| Trimethoprim-Sulphamethoxazole | VCI                                                                                | HI                                                                                                   | D                                                           | A                               |
| Penicillin                     | VCI                                                                                | HI                                                                                                   | D                                                           | A                               |
| Gentamicin                     | VCI                                                                                | CI (High priority)                                                                                   | C                                                           | A                               |
| Metronidazole                  | Not listed                                                                         | I                                                                                                    | D                                                           | A                               |
| Ciprofloxacin                  | VCI                                                                                | CI (Highest priority)                                                                                | B                                                           | W                               |
| Levofloxacin                   | VCI                                                                                | CI (Highest priority)                                                                                | B                                                           | W                               |
| Nozomil                        | Not listed                                                                         | Not listed                                                                                           | Not listed                                                  | Not listed                      |

VCI- Veterinary Critically Important Antimicrobial Agents, CI- Critically Important, HI- Highly Important, I-Critically Important, B-Restrict, C-Caution, D-Prudence, A-Access, W-Watch

**Table S3.** Antimicrobial use based on European Medicines Agency and AwaRe classification<sup>1</sup> among livestock in Sierra Leone, March- October 2021<sup>2</sup>

| Livestock species            | Number of livestock treated with antimicrobials | European Medicines Agency classification |                    |                    |                    |                    |                    | AwaRe classification |  |
|------------------------------|-------------------------------------------------|------------------------------------------|--------------------|--------------------|--------------------|--------------------|--------------------|----------------------|--|
|                              |                                                 | Restrict                                 | Caution            | Prudence           | Access             | Watch              |                    |                      |  |
|                              | n                                               | n (%) <sup>3</sup>                       | n (%) <sup>3</sup> | n (%) <sup>3</sup> | n (%) <sup>3</sup> | n (%) <sup>3</sup> | n (%) <sup>3</sup> |                      |  |
| Cattle                       | 168                                             | 0 (0.0)                                  | 30 (17.9)          | 115 (68.5)         | 37 (22.0)          | 78 (46.4)          |                    |                      |  |
| Dogs                         | 43                                              | 17 (39.5)                                | 0 (0.0)            | 20 (46.5)          | 2 (4.7)            | 35 (81.4)          |                    |                      |  |
| Donkeys                      | 1                                               | 0 (0.0)                                  | 0 (0.0)            | 0 (0.0)            | 0 (0.0)            | 0 (0.0)            |                    |                      |  |
| Fowl                         | 3                                               | 0 (0.0)                                  | 0 (0.0)            | 3 (100.0)          | 0 (0.0)            | 3 (100.0)          |                    |                      |  |
| Goat                         | 1576                                            | 16 (1.0)                                 | 274 (17.4)         | 785 (49.8)         | 43 (2.7)           | 775 (49.2)         |                    |                      |  |
| Goats and Sheep <sup>4</sup> | 402                                             | 0 (0.0)                                  | 31 (7.7)           | 371 (92.3)         | 46 (11.4)          | 335 (83.3)         |                    |                      |  |
| Horse                        | 15                                              | 0 (0.0)                                  | 0 (0.0)            | 15 (100.0)         | 0 (0.0)            | 15 (100.0)         |                    |                      |  |
| Pig                          | 105                                             | 0 (0.0)                                  | 8 (7.6)            | 81 (77.1)          | 0 (0.0)            | 81 (77.1)          |                    |                      |  |
| Rabbit                       | 4                                               | 0 (0.0)                                  | 0 (0.0)            | 4 (100.0)          | 0 (0.0)            | 4 (100.0)          |                    |                      |  |
| Sheep                        | 692                                             | 11 (1.6)                                 | 131 (18.9)         | 418 (60.4)         | 0 (3.9)            | 418 (60.4)         |                    |                      |  |
| Not recorded                 | 11                                              | 0 (0.0)                                  | 0 (0.0)            | 2 (18.8)           | 0 (0.0)            | 2 (18.8)           |                    |                      |  |
| Total                        | 3020                                            | 44 (1.4)                                 | 474 (15.6)         | 1814 (60.1)        | 155 (5.1)          | 1734 (57.4)        |                    |                      |  |

<sup>1</sup> A-Access, W-Watch, Re-Reserve

<sup>2</sup> Reports with discrepancies between numbers of susceptible vs sick vs treated, Multiple antimicrobials belonging to different categories may be used for the same condition,

<sup>3</sup> Percentages calculated out of all animals initiated on antimicrobial treatment

<sup>4</sup> Some reports mentioned species as "Goats and sheep", and disaggregated species wise information was not available, hence retained as a separate category

**Table S4.** Number of animals that were initiated on specific antimicrobials based on species in Sierra-Leonne, March-October 2021

| Animal species               | Number of animals treated with antimicrobials | Tylosin |                  | Oxytetracycline |                  | Trimethoprim sulphamethoxazole |                  | Gentamicin |                  | Penicillin |                  | Nozomil |                  | Metronidazole |                  | Ciprofloxacin |                  | Levofloxacin |                  | No Antibiotic specified |                  |
|------------------------------|-----------------------------------------------|---------|------------------|-----------------|------------------|--------------------------------|------------------|------------|------------------|------------|------------------|---------|------------------|---------------|------------------|---------------|------------------|--------------|------------------|-------------------------|------------------|
|                              |                                               | n       | (%) <sup>2</sup> | n               | (%) <sup>2</sup> | n                              | (%) <sup>2</sup> | n          | (%) <sup>2</sup> | n          | (%) <sup>2</sup> | n       | (%) <sup>2</sup> | n             | (%) <sup>2</sup> | n             | (%) <sup>2</sup> | n            | (%) <sup>2</sup> | n                       | (%) <sup>2</sup> |
| Cattle                       | 168                                           | 0       | (0.0)            | 78              | (46.4)           | 5                              | (3.0)            | 0          | (0.0)            | 32         | (19.0)           | 0       | (0.0)            | 0             | (0.0)            | 0             | (0.0)            | 0            | (0.0)            | 42                      | (25.0)           |
| Dogs                         | 43                                            | 30      | (69.8)           | 18              | (41.9)           | 2                              | (4.7)            | 0          | (0.0)            | 0          | (0.0)            | 4       | (9.3)            | 0             | (0.0)            | 14            | (32.6)           | 3            | (7.0)            | 8                       | (18.6)           |
| Donkeys                      | 1                                             | 0       | (0.0)            | 0               | (0.0)            | 0                              | (0.0)            | 0          | (0.0)            | 0          | (0.0)            | 0       | (0.0)            | 0             | (0.0)            | 0             | (0.0)            | 0            | (0.0)            | 0                       | (0.0)            |
| Fowl                         | 3                                             | 0       | (0.0)            | 3               | (100.0)          | 0                              | (0.0)            | 0          | (0.0)            | 0          | (0.0)            | 0       | (0.0)            | 0             | (0.0)            | 0             | (0.0)            | 0            | (0.0)            | 0                       | (0.0)            |
| Goat                         | 1576                                          | 271     | (17.2)           | 759             | (48.2)           | 26                             | (1.6)            | 13         | (0.8)            | 0          | (0.0)            | 0       | (0.0)            | 4             | (0.3)            | 0             | (0.0)            | 16           | (1.0)            | 659                     | (41.8)           |
| Goats and Sheep <sup>4</sup> | 402                                           | 21      | (5.2)            | 335             | (83.3)           | 0                              | (0.0)            | 10         | (2.5)            | 36         | (9.0)            | 0       | (0.0)            | 0             | (0.0)            | 0             | (0.0)            | 0            | (0.0)            | 7                       | (1.7)            |
| Horse                        | 15                                            | 0       | (0.0)            | 15              | (100.0)          | 0                              | (0.0)            | 0          | (0.0)            | 0          | (0.0)            | 0       | (0.0)            | 0             | (0.0)            | 0             | (0.0)            | 0            | (0.0)            | 0                       | (0.0)            |
| Pig                          | 105                                           | 8       | (7.6)            | 81              | (77.1)           | 0                              | (0.0)            | 0          | (0.0)            | 0          | (0.0)            | 0       | (0.0)            | 0             | (0.0)            | 0             | (0.0)            | 0            | (0.0)            | 16                      | (15.2)           |
| Rabbit                       | 4                                             | 0       | (0.0)            | 4               | (100.0)          | 0                              | (0.0)            | 0          | (0.0)            | 0          | (0.0)            | 0       | (0.0)            | 0             | (0.0)            | 0             | (0.0)            | 0            | (0.0)            | 4                       | (100.0)          |
| Sheep                        | 692                                           | 160     | (23.1)           | 397             | (57.4)           | 20                             | (2.9)            | 4          | (0.6)            | 0          | (0.0)            | 0       | (0.0)            | 3             | (0.4)            | 2             | (0.3)            | 9            | (1.3)            | 223                     | (32.2)           |
| Not recorded                 | 11                                            | 1       | (9.1)            | 2               | (18.2)           | 0                              | (0.0)            | 0          | (0.0)            | 0          | (0.0)            | 0       | (0.0)            | 0             | (0.0)            | 0             | (0.0)            | 0            | (0.0)            | 8                       | (72.7)           |
| Total                        | 3020                                          | 491     | (16.3)           | 1692            | (56.0)           | 53                             | (1.8)            | 27         | (0.9)            | 68         | (2.3)            | 4       | (0.1)            | 7             | (0.2)            | 16            | (0.5)            | 28           | (0.9)            | 967                     | (32.0)           |

<sup>1</sup>Reports with discrepancies between numbers of susceptible vs sick vs treated were excluded from analysis

<sup>2</sup> Percentage of sick out of susceptible animals

<sup>3</sup> Percentage of animals initiated on antimicrobial or anthelmintic treatment out of sick animals

<sup>4</sup>Some reports mentioned species as “Goats and sheep” and disaggregated species wise information was not available, hence retained as a separate category
